# Supplementary material for: Chemical Characterisation and a Comparative Study on Multi-Target Biological Activities of Root Part Extracts of Coleus barbatus (Andrews) Bent. ex G. Don with its Isolated Compound, Forskolin
Source: Research Square preprint supplement (doi:10.21203/rs.3.rs-7690438/v1), 2025-11-21
Supplement: Supplementary file 1 [file f6efb9a7241a0b650352b7c2.docx]

**Table 1. Chemical composition of the extracts from root part of *C. barbatus***

| **S.No.** | **Compound** | **KI** | **% Composition** | | |
| --- | --- | --- | --- | --- | --- |
| **CBREE** | **Nonpolar fraction** | **Polar fraction** |
| **1** | Methyllaurat | - | - | 0.7 | - |
| **2** | Ethylbenzene | 878 | - | 0.2 | - |
| **3** | *o*-xylene | 892 | - | 0.4 | - |
| **4** | α- thujene | 930 | - | - | 0.6 |
| **5** | α-pinene | 939 | 1.1 | 0.8 | 0.4 |
| **6** | camphene | 954 | 0.8 | 0.6 | 0.2 |
| **7** | β-pinene | 979 | 1.2 | 1.0 | 0.2 |
| **8** | β-phellandren | 1002 | 0.7 | - | - |
| **9** | 3-δ-carene | 1011 | - | - | 0.1 |
| **10** | α-terpinene | 1017 | t | t | - |
| **11** | cis-hydrindan | 1022 | 1.7 |  |  |
| **12** | *p*-cymene | 1024 | 0.2 | 0.2 | t |
| **13** | α-limonene | 1028 | - | - | 0.1 |
| **14** | β-phellandrene | 1029 | - | 0.7 | 0.3 |
| **15** | *trans*-β-ocimene | 1050 | - | - | 0.1 |
| **16** | γ-terpinene | 1059 | 0.1 | t | 0.1 |
| **17** | Acetophenone | 1065 | - | - | 1.7 |
| **18** | α-terpinolene | 1086 | - | - | t |
| **19** | α-cumyl alcohol | 1089 | - | - | 0.2 |
| **20** | α-monoacetin | 1095 | 0.4 | - | - |
| **21** | β-linalool | 1096 | 0.6 | t | 0.2 |
| **22** | Undecane | 1100 | t | 0.1 | 0.1 |
| **23** | Nonanal | 1100 |  | 0.3 |  |
| **24** | *neo* allo ocimene | 1129 | - | 0.2 | - |
| **25** | *trans*-borneol | 1165 | 0.8 | 0.8 | 0.7 |
| **26** | 1-nonanol | 1169 | 0.4 | 0.4 | - |
| **27** | 4-terpineol | 1177 | 0.5 | 0.6 | 0.2 |
| **28** | α-terpineol | 1186 | - | 0.2 | - |
| **29** | n-dodecane | 1200 | - | - | 0.3 |
| **30** | **Decanal** | 1201 | **6.5** | **5.5** | **3.2** |
| **31** | β-cyclocitral | 1218 | 0.1 | 0.1 | - |
| **32** | α-fenchyl acetate | 1220 |  | - | **2.9** |
| **33** | linalool acetate | 1257 | 0.1 | - | - |
| **34** | 1. n-decanol | 1266 | 1.6 | 1.5 | - |
| **35** | β-terpinyl acetate | 1267 | 0.1 | - | - |
| **36** | Bergamiol | 1272 | - | 0.2 | - |
| **37** | [nonyl acetate](https://de.wikipedia.org/wiki/Essigs%C3%A4urenonylester) | 1282 | 0.3 | 0.4 | - |
| **38** | 1. methyl 2,5-dimethylbenzoate | 1287 | 0.3 | 0.4 | - |
| **39** | **bornyl acetate** | 1288 | **6.5** | **6.7** | - |
| **40** | Panaxene | 1313 | 1.5 | - | - |
| **41** | dodecamethylcyclohexasiloxane | 1342 | - | - | 0.4 |
| **42** | α-cubebene | 1348 | - | - | 0.2 |
| **43** | α-terpinyl acetate | 1349 | - | 0.2 | - |
| **44** | ***p*-eugenol** | 1359 | - | - | **2.8** |
| **45** | neryl acetate | 1361 | 0.6 | - | - |
| **46** | capric acid | 1366 | 1.7 | 1.9 | - |
| **47** | 1α,2,5,5-tetramethyl-cis-1α,4 α,5,6, 7,8-hexahydro-gamma-chromene | 1370 | - | - | 0.2 |
| **48** | **(-)-β-elemene** | 1375 | - | - | **2.6** |
| **49** | α-copaene | 1376 | - | - | 0.1 |
| **50** | β-maaliene | 1380 | 0.5 | 0.5 | - |
| **51** | - γ-maaliene | 1398 | 0.7 | - | - |
| **52** | tetradecane | 1400 | - | - | 0.5 |
| **53** | 7-epi-sesquithujene | 1406 | 0.3 | - | - |
| **54** | 1. **n-decyl acetate** | 1408 | **2.8** | 1.9 | - |
| **55** | α-gurgujene | 1411 | 0.5 | - | - |
| **56** | *cis*-α-bergamotene | 1412 | 0.7 | 0.6 | 0.2 |
| **57** | Longifolen | 1416 | - | 0.4 | - |
| **58** | **β-caryophyllene** | 1419 | 1.1 | 1.0 | **2.9** |
| **59** | 1. **selina-5,11-diene** | 1447 | **3.7** | **3.2** | 0.6 |
| **60** | α-humulene | 1454 | - | - | 0.3 |
| **61** | *trans*-β-farnesene | 1457 | 0.3 | 0.7 | - |
| **62** | 1,1-diethoxydecane | 1473 | 0.5 | - | - |
| **63** | γ-gurjunene | 1477 | 0.1 | - | - |
| **64** | α-curcumene | 1480 | 0.3 | 0.4 |  |
| **65** | *trans*-β-bergamotene | 1483 | 0.6 | - | - |
| **66** | 1-acetamidobicyclo(3.2.0)heptan-2-one | 1486 | - | - | 0.9 |
| **67** | Valencene | 1490 | - | 0.3 | - |
| **68** | β-bisabolene | 1507 | 1.3 | 1.3 | - |
| **69** | tetradecamethylcycloheptasiloxane | 1519 | - | - | 0.3 |
| **70** | **β-sesquiphellandrene** | 1522 | **4.1** | **3.6** | 0.7 |
| **71** | selina-3,7(11)-diene | 1545 | 0.2 | 0.2 | - |
| **72** | germacrene B | 1550 | - | 1.3 | 0.2 |
| **73** | 4-(1,5-Dimethylhex-4-enyl)cyclohex-2-enone | 1551 | 0.3 | - | - |
| **74** | *trans*-nerolidol | 1563 | 0.7 | 0.5 | - |
| **75** | 1,5,9,9-tetramethyl-1,4,7-cycloundecatriene | 1579 | 1.3 | 0.7 |  |
| **76** | caryophyllene oxide | 1583 | 0.5 | 0.6 | - |
| **77** | 1. (+)-[cedrol](https://www.ncbi.nlm.nih.gov/pcsubstance/?term=%22Cedrol%22%5BCompleteSynonym%5D%20AND%2065575%5BStandardizedCID%5D) | 1600 |  | 1.2 | 0.2 |
| **78** | lauryl acetate | 1607 | - | - | 0.3 |
| **79** | Epicedrol | 1611 | 1.3 | - | - |
| **80** | **spiro[4.5]decan-7-one, 1,8-dimethyl-8,9-epoxy-4-isopropyl** | 1626 | - | - | **6.1** |
| **81** | Cedrelanol | 1640 | 0.5 | 0.3 |  |
| **82** | 1. β-[selinenol](https://www.ncbi.nlm.nih.gov/pcsubstance/?term=%22beta-Selinenol%22%5BCompleteSynonym%5D%20AND%2091457%5BStandardizedCID%5D) | 1649 | 0.2 |  |  |
| **83** | α-eudesmol | 1653 | - | 0.4 | - |
| **84** | widdrol hydroxyether | 1664 | - | - | 0.4 |
| **85** | 7(11)-selinen-4α-ol | 1681 | 0.4 | - | - |
| **86** | 1. n-heptadecane | 1700 | - | - | 0.2 |
| **87** | myristic acid | 1750 | - | 0.2 | - |
| **88** | humulane-1,6-dien-3-ol | 1757 | - | 0.1 | - |
| **89** | Scleral | 1822 | - | 0.8 | 0.3 |
| **90** | *trans*-valerenyl acetate | 1831 | - | 0.2 | - |
| **91** | 4-(1-hydroperoxy-2,2-dimethyl-6-methylene-cyclohexyl)-pent-3-en-2-one | 1835 | - | - | 0.1 |
| **92** | octadeamethyl-cyclononasiloxane | 1858 | - | - | 0.3 |
| **93** | 2,2,6 α,7α tetramethylbicyclo [4.3.0] nonan-7β-ol | - | - | - | 0.8 |
| **94** | laciniatafuranone H | - | - | - | 0.2 |
| **95** | acetic acid 1-[2-(2,2,6-trimethyl-bicyclo[4.1.0]hept-1-yl)-ethyl]-vinyl ester | - | - | - | 0.4 |
| **96** | isopimara-9(11),15-diene | 1906 | 0.2 | 0.3 | - |
| **97** | **palmitic acid** | 1960 | **2.3** | **3.3** |  |
| **98** | **1-(1-heptadecynyl)cyclopentanol** | - | - | **7.7** | - |
| **99** | **spiro[4,5]decan7-one, 1,8-dimethyl-8,9-epoxy-4-isopropyl** | - | - | **2.8** | - |
| **100** | 2,2,6A,7A-tetramethylbicyclo[4.3.0]nonan-7β-ol | - | - | 1.7 | - |
| **101** | Campesterin | - | - | 0.9 | - |
| **102** | *iso*-chamaecydin | - | - | 0.3 | - |
| **103** | 20β-21-dihydroxypregn-4-ene-3-one t-butyl boronate | - | - | 0.7 | - |
| **104** | palmitic acid-ethyl ester | 1968 | 0.1 | - | - |
| **105** | n-eicosane | 2000 | - | - | 0.7 |
| **106** | Thunbergol | 2032 | - | - | 0.4 |
| **107** | 1. dibutyl phthalate | 2037 | 0.2 | - | - |
| **108** | palmitic acid-TMS derivative | 2047 | - | 0.2 | - |
| **109** | 4-acetyltetradecahydro-11h benzo[a] cyclopenta[d] cycloocten-11-one | 2071 | - | - | 0.1 |
| **110** | **Dehydroabietan** | 2073 | **2.0** | **3.0** | - |
| **111** | **(11*E*,13*Z*)-labdadien-8-ol** | 2095 | **2.6** | **3.5** | - |
| **112** | Heneicosane | 2100 | 0.2 | 1.6 | - |
| **113** | n-nonadecanol | 2150 | 0.1 | t | - |
| **114** | ethyl oleate | 2171 | 1.2 | - | - |
| **115** | Sclareol | 2223 | - | - | 0.9 |
| **116** | **methyl 3,4 α,7,10 α -tetramethyl-3-vinyldodecahydro-1H benzo**  **[f]chromene-7-carboxylate** | 2244 | - | - | 4.1 |
| **117** | heptadecyl pivalate | 2291 | 0.9 | - | - |
| **118** | 2,2,6α-7α- tetramethyl-bicyclo(4.3.0)nonan-1β-ol | - | 1.7 | - | - |
| **119** | ***trans*-totarol** | 2314 | **2.6** | **2.4** | - |
| **120** | α-levantenolide | 2324 | 1.4 | 1.2 | - |
| **121** | 11-methyltricosane | 2336 | 0.1 | - | - |
| **122** | Tetracosane | 2400 | - | 0.2 | - |
| **123** | n-docosanal | 2408 | - | - | 0.3 |
| **124** | 4,4-dimethyl-7-oxoandrost-5-en-3-yl acetate | 2413 | - | - | 0.7 |
| **125** | (2-pentadecyl-1,3-dioxolan-4-yl)methyl acetate | 2457 | 0.5 | 0.5 | - |
| **126** | β-monopalmitin | 2519 | 0.7 | - | - |
| **127** | 2-methylhexacosane | 2663 | - | **4.2** | 0.2 |
| **128** | α-monostearin | 2681 | - | 1.4 | - |
| **129** | **γ-sitosterol** | 2731 | **2.1** | **2.0** | 0.4 |
| **130** | decyl palmitate | 2753 | - | 0.5 | - |
| **131** | Squalene | 2790 | - | 0.2 | - |
| **132** | 2,6,10,15,19,23-hexamethyl-2,6,10,14,18,22-tetracosahexaene | 2818 | 0.3 | - | - |
| **133** | **Forskolin** | 2900 | **4.6** | - | **36.0** |
| **134** | γ-sitostenone | 3483 | 0.6 | 0.6 | - |
| **135** | Campesterin | - | 1.1 |  |  |
| **136** | **n-hexatriacontane** | 3600 | **6.4** | **3.5** | 1.1 |
| **137** | (+)-ascorbic acid 2,6-dihexadecanoate | 4765 | 0.6 | - | - |
| **138** | Tetrapentacontane | 5389 | 0.1 | - | - |
| **Total** | | | **83.3** | **87.2** | **78.7** |

t= trace (less than 0.1%), KI= Kovats indices, CBREE= *C. barbatus* root part ethyl acetate extract

**Table 2: 1H NMR, 13C NMR and DEPT-135 of compound ⋕01**

| **Carbon** | **δH** | **Coupling contant (Hz)** | **δc** | **DEPT-135** |
| --- | --- | --- | --- | --- |
| **1** | 3.50 (d 1OH); 4.56 (ddd- 1H) | 2.5 (H-1α);  3.0 (H-2β), 2.5(H-2α), 2.5 (1β-OH) | 74.31 | +ve(-CH) |
| **2** | 2.16 β-H and 1.42α-H (dddd) | 15.0 (H-2α), 2.5 (H-1α), 13.3 (H-3α), 4.0 (H-3β); 15.0 (H-2β), 3.0 (H-1α), 3.5(H-3α), 3.0 (H-3β) | 26.52 | -ve(-CH2) |
| **3** | 1.71α-H and 1.12 β –H (ddd) | 13.4 (H-3β), 3.5 (H-2α), 13.3 (H-2β); 13.4 (H-3α), 3.0 (H-2β), 4.0 (H-2α) | 36.07 | -ve(-CH2) |
| **4** | - | - | 34.42 | Quaternary carbon |
| **5** | 2.16 (dd) | 3.2 (H-6α), 1.8 (6β-OH) | 42.80 | +ve(-CH) |
| **6** | 1.96 (d 1OH); 4.47 (ddd 1H) | 14.0(H-6α);  3.2 (H-5α),2.8(6β-OH), 4.3 (H-7α) | 69.86 | +ve(-CH) |
| **7** | 5.47 (d) | 3.5 (H-6α) | 76.59 | +ve(-CH) |
| **8** | - | - | 81.40 | Quaternary carbon |
| **9** | 6.27 (s-1OH) | - | 81.64 | Quaternary carbon |
| **10** | - | - | 42.92 | Quaternary carbon |
| **11** | - | - | 207.01 | Quaternary carbon |
| **12** | 3.20α-H(d); 2.47β-H(d) | 17.0 (H-12β);  17.0(H-12α) | 48.74 | -ve(-CH2) |
| **13** | - | - | 75.01 | Quaternary carbon |
| **14** | 5.95 (dd) | 10.5 (H-15 *cis*), 17.5 (H-15 *trans*) | 146.28 | +ve(-CH) |
| **15** | 4.98*cis* (d); 5.29*trans*(d) | 10.5 (H-14);  17.0(H-14) | 110.68 | -ve(-CH2) |
| **16** | 1.34 (s) | - | 31.50 | +ve(-CH3) |
| **17** | 1.71 (s) | - | 23.58 | +ve(-CH3) |
| **18** | 1.04 (s) | - | 32.97 | +ve(-CH3) |
| **19** | 1.26 (s) | - | 24.32 | +ve(-CH3) |
| **20** | 1.42 (s) | - | 19.81 | +ve(-CH3) |
| **21** | - | - | 169.82 | Quaternary carbon |
| **22** | 2.16 (s) | - | 21.18 | +ve(-CH3) |

**Table 3. Biochemical assay of the extracts from root part of *C. barbatus***

| **S.No.** | **Sample name** | **Total phenolic content (mg/g GAE)** | **Total flavonoid content (mg/g CNE)** | **Orthodihydric phenol (mg/g CLE)** |
| --- | --- | --- | --- | --- |
| **1** | **CBREE** | 17.68±0.26a | 71.73±0.55c | 7.07±0.25c |
| **2** | **Nonpolar fraction** | 47.72±0.26c | 26.82±0.41a | 4.55±0.43a |
| **3** | **Polar fraction** | 21.14±0.13b | 34.93±0.69b | 6.80±0.52b |

CBREE=*C. barbatus* root part ethyl acetate extract, GAE= Gallic acid equivalent, CNE= Catechin equivalent, CLE= Catechol equivalent. Values are means of three replicates±SD. Within a column, mean values followed by the same letter are not significantly different according to Tukey’s test (p<0.05).

**Table 4. Antioxidant activity of the extracts and isolated compound from the root part of *C. barbatus***

| **Sample/**  **Standard** | **Antioxidant activity in terms of IC50/RP50 (µg/mL±SD)** | | | | | |
| --- | --- | --- | --- | --- | --- | --- |
|  | **DPPH radical**  **scavenging activity** | **Hydroxyl radical scavenging activity** | **Nitric oxide radical scavenging activity** | **Superoxide radical scavenging activity** | **Reducing power activity** | **Metal chelating activity** |
| **CBREE** | 62.18±0.20d | 106.00±0.35b | 159.39±0.59e | 161.68±0.25d | 198.33±0.84d | 216.47±0.25d |
| **Nonpolar fraction** | 167.38±0.08e | 152.09±1.36e | 151.20±0.13d | 168.84±0.87e | 209.44±0.91e | 243.48±1.08e |
| **Polar fraction** | 57.55±0.12c | 118.30±1.30c | 134.92±0.36c | 144.47±0.47c | 124.21±0.33c | 180.96±0.18b |
| **Forskolin** | 169.89±0.15f | 123.92±1.71d | 129.60±0.41b | 115.82±0.45b | 260.26±0.76f | 186.92±0.32c |
| **BHT*** | 52.27±0.74b | - | - | - | 74.35±0.45a | - |
| **Catechin*** | 38.35±0.72a | **-** | **-** | **-** | - | **-** |
| **Ascorbic acid*** | **-** | 58.33±1.41a | 73.89±0.96a | 72.21±0.74a | 85.52±0.24b | **-** |
| **EDTA*** | **-** | **-** | **-** | **-** | **-** | 115.15±0.30a |

*= Standard antioxidant, Values are means of three replicates±standard deviation, CBREE= *Coleus barbatus* root part ethyl acetate extract, BHT= Butylated hydroxytoluene, EDTA= Ethylene diaminetetraacetic acid, IC50= Half maximal inhibitory concentration, RP50= Half maximal reducing power, SD= Standard deviation. Within a column, mean values followed by the same letter are not significantly different according to Tukey’s test (p<0.05).

**Table 5. *In vitro* anti-inflammatory activity of extracts and isolated compound from the root part of *C. barbatus***

| **Sample/Standard** | **IC50 value (µg/mL±SD** |
| --- | --- |
| CBREE | 130.10±0.75c |
| Nonpolar fraction | 198.07±1.48e |
| Polar fraction | 139.20±0.86d |
| Forskolin | 112.35±0.95b |
| Diclofenac sodium* | 101.59±0.96a |

*= Standard, Values are means of three replicates±standard deviation, CBREE= *Coleus barbatus* root part ethyl acetate extract, IC50**=**Half maximal inhibitory concentration, SD= Standard deviation. Within a column, mean values followed by the same letter are not significantly different according to Tukey’s test (p<0.05)

**Table 6. Mean percent seed germination inhibition by extracts and isolated compound from the root part of *C. barbatus***

| **Sample name** | **% Inhibition of seed germination** | | | | |
| --- | --- | --- | --- | --- | --- |
| **1 %** | **2 %** | **3 %** | **4 %** | **5 %** |
| **CBREE** | 13.33±5.77a | 23.33±5.77b | 30.00±0.00b | 40.00±0.00c | 50.00±0.00d |
| **Nonpolar fraction** | 13.33±5.77a | 23.33±5.77ab | 26.67±5.77ab | 36.67±5.77b | 56.67±5.77c |
| **Polar fraction** | 6.67±5.77a | 23.33±5.77b | 36.67±5.77c | 43.33±5.77c | 63.33±5.77d |
| **Forskolin** | 13.33±5.77a | 36.67±5.77b | 46.67±5.77b | 63.33±5.77c | 83.33±5.77d |
| **Pendimethalin*** | 100.00±0.00 | 100.00±0.00 | 100.00±0.00 | 100.00±0.00 | 100.00±0.00 |

*= Standard herbicide, Values are means of three replicates±standard deviation, CBREE= *Coleus barbatus* root part ethyl acetate extract. Within a row, mean values followed by the same letter are not significantly different according to Tukey’s test (p<0.05)

**Table 7. Antibacterial activity of extracts and isolated compound from the root part of *C. barbatus* against *B. cereus* and *E. coli***

| **Sample name** | **Zone of inhibition (ZOI) in mm±SD against *Bacillus cereus*** | | | | |
| --- | --- | --- | --- | --- | --- |
| **200 ppm** | **400 ppm** | **600 ppm** | **800 ppm** | **1000 ppm** |
| **CBREE** | 11.00±1.00a | 11.33±0.58a | 12.67±0.58a | 14.33±0.58b | 15.67±0.58b |
| **Nonpolar fraction** | 8.67±0.58a | 10.67±0.58b | 11.67±0.58bc | 13.00±0.00c | 15.00±1.00d |
| **Polar fraction** | 11.33±0.58a | 12.33±0.58a | 13.00±1.00a | 15.33±0.58b | 16.67±0.58b |
| **Forskolin** | 19.00±1.00a | 21.33±1.15b | 23.00±1.00b | 25.67±0.58c | 28.00±1.00d |
| **Rifamycin*** | 18.67±0.58a | 22.33±0.58b | 23.67±0.58b | 25.67±0.58c | 30.67±1.15d |
|  | **Zone of inhibition (ZOI) in mm±SD against *Escherichia coli*** | | | | |
| **CBREE** | 6.00±1.00a | 10.33±0.58b | 12.67±0.58c | 13.33±0.58c | 16.00±1.00d |
| **Nonpolar fraction** | 7.33±1.53a | 11.00±1.00b | 12.67±0.58bc | 13.33±0.58c | 16.33±0.58d |
| **Polar fraction** | 10.33±1.15a | 10.67±1.15a | 12.33±0.58ab | 14.00±0.00b | 14.33±0.58b |
| **Forskolin** | 16.33±0.58a | 20.00±1.00b | 23.67±0.58c | 25.00±1.00c | 27.67±1.53d |
| **Rifamycin*** | 18.33±0.58a | 20.67±0.58b | 22.00±1.00b | 26.00±1.00c | 29.00±1.00d |

*= Standard, Values are means of three replicates±standard deviation, CBREE= *Coleus barbatus* root part ethyl acetate extract, SD= Standard deviation. Within a raw, mean values followed by the same letter are not significantly different according to Tukey’s test (p<0.05).

**Table 8. Minimum inhibitory concentration of various extracts and isolated compound from root part of *C. barbatus* against *B. cereus* and *E. coli***

| **S.No.** | **Sample name** | **Minimum inhibitory concentration (ppm)** | |
| --- | --- | --- | --- |
| ***Bacillus cereus*** | ***Escherichia coli*** |
| **1** | **CBREE** | 150 | 200 |
| **2** | **Nonpolar fraction** | 200 | 200 |
| **3** | **Polar fraction** | 150 | 200 |
| **4** | **Forskolin** | 100 | 100 |

CBREE= *Coleus barbatus* root part ethyl acetate extract

**Table 9. Percent mycelial growth inhibition of *A. alternata* and *C. lunata* by extracts and**

**isolated compound from root part of *C. barbatus***

| **Concentration**  **(ppm)** | **Percent mycelial growth inhibition** | | | | | | | |
| --- | --- | --- | --- | --- | --- | --- | --- | --- |
| ***Alternaria alternata*** | | | | ***Curvularia lunata*** | | | |
| **CBREE** | **Nonpolar fraction** | **Polar fraction** | **Forskolin** | **CBREE** | **Nonpolar fraction** | **Polar fraction** | **Forskolin** |
| 200 | 34.44±0.63a | 38.59±1.01a | 12.44±1.17a | 31.95±0.64a | 27.38±1.08a | 51.45±0.35a | 23.24±0.65a | 31.53±0.49a |
| 400 | 38.17±0.63b | 40.24±1.63ab | 22.41±0.16b | 39.00±0.44b | 42.33±0.30b | 57.26±0.41b | 31.53±0.49b | 33.61±0.24b |
| 600 | 59.75±0.90c | 41.49±0.42b | 24.89±1.09c | 51.45±0.35c | 44.81±0.98c | 59.75±0.43c | 38.59±1.01c | 37.34±1.02c |
| 800 | 64.32±0.63d | 44.81±0.32c | 28.22±0.64d | 60.17±1.01d | 61.83±0.63d | 65.97±0.87d | 43.56±0.99d | 61.83±1.16d |
| 1000 | 73.45±0.53e | 68.47±0.49d | 31.95±0.64e | 80.92±0.58e | 76.76±0.65e | 80.50±0.66e | 55.60±0.63e | 74.69±0.83e |
| Carbendazim* | 100.0±00 | 100.0±00 | 100.0±00 | 100.0±00 | 100.0±00 | 100.0±00 | 100.0±00 | 100.0±00 |

*= Standard, Values are means of three replicates±standard deviation, CBREE *Coleus barbatus* root part ethyl acetate extract. Within a column, mean values followed by the same letter are not significantly different according to Tukey’s test (p<0.05).

**Table 10. Antifeedant activity of extracts and isolated compound from root part of *C. barbatus* against third instar larvae of *S. obliqua***

| **Sample**  **name** | **Conc.**  **(%)** | **MLAC**  **(cm²±SD)** | **Feeding**  **percent** | **Antifeedant**  **activity**  **(%)** | **Feeding**  **inhibition**  **(%)** | **Preference index**  **(C-value)** | **Antifeedant category** |
| --- | --- | --- | --- | --- | --- | --- | --- |
| **CBREE** | **1** | 14.66±0.71e | 58.65 | 23.42 | 13.26 | 0.87 | Slightly |
| **2** | 11.77±0.44d | 47.07 | 38.54 | 23.87 | 0.76 | Slightly |
| **3** | 8.68±0.77c | 34.71 | 54.68 | 37.63 | 0.62 | Moderately |
| **4** | 6.97±0.56b | 27.87 | 63.61 | 46.64 | 0.53 | Moderately |
| **5** | **4.85±0.48a** | **19.41** | **74.65** | **59.56** | **0.40** | **Strongly** |
| **Nonpolar fraction** | **1** | 15.23±0.44e | 60.93 | 20.44 | 11.38 | 0.89 | Slightly |
| **2** | 12.31±0.77d | 49.23 | 32.43 | 19.35 | 0.81 | Slightly |
| **3** | 9.87±0.18c | 39.49 | 45.79 | 29.69 | 0.70 | Moderately |
| **4** | 6.11±0.47b | 24.45 | 66.43 | 49.74 | 0.50 | Strongly |
| **5** | **3.97±0.32a** | **15.89** | **78.18** | **64.18** | **0.36** | **Strongly** |
| **Polar fraction** | **1** | 15.37±0.19e | 61.47 | 19.74 | 10.95 | 0.89 | Slightly |
| **2** | 13.16±0.40d | 52.63 | 31.28 | 18.54 | 0.81 | Moderately |
| **3** | 10.16±0.27c | 40.65 | 46.92 | 30.65 | 0.69 | Moderately |
| **4** | 7.42±0.29b | 29.67 | 61.26 | 44.16 | 0.56 | Moderately |
| **5** | **5.11±0.77a** | **20.45** | **73.29** | **57.85** | **0.42** | **Strongly** |
| **Forskolin** | **1** | 15.31±0.4e | 61.23 | 19.13 | 10.57 | 0.89 | Slightly |
| **2** | 11.04±0.74d | 44.17 | 41.65 | 26.30 | 0.74 | Moderately |
| **3** | 7.36±0.58c | 29.45 | 61.10 | 43.98 | 0.56 | Moderately |
| **4** | 5.08±0.58b | 20.33 | 73.14 | 57.66 | 0.42 | **Strongly** |
| **5** | **2.35±0.17a** | **9.39** | **87.60** | **77.94** | **0.22** | **Extremely** |
| **Control** | | 19.15±0.53f | 76.59 | - | - | - | - |

MLAC= Mean leaf area consumed, Values are means of three replicates±standard deviation, CBREE= *Coleus barbatus* root part ethyl acetate extract, SD= Standard deviation. Within a column, mean values followed by the same letter are not significantly different according to Tukey’s test (p<0.05). Antifeedant category on the bases of **C-values (**0.1-0.25= Extremely, 0.26-0.50= Strongly, 0.51-0.75= Moderately, 0.76-0.99= Slightly antifeedant, ≥1= Preferred plant **(Sharma and Bisht, 2008)**)
